# Supplementary material
Source: Springer Nature journal article supplement (https://www.springermedizin.de/resource/supplementary/12888_2007_251_MOESM2_ESM.pdf/9482328)
Supplement: MOESM2 [file 9482328]

Table4

The Comparison of "Middle Age" Class and Other Classes Except For "Middle Age"

|                               |                                | Middle Age (n=43) | Except Middle Age (n=277) | Analysis |    |       |
|-------------------------------|--------------------------------|-------------------|---------------------------|----------|----|-------|
|                               |                                | N (%)             | N (%)                     | $\chi^2$ | df | P     |
| Methods                       |                                |                   |                           |          |    |       |
|                               | Drug over Dose                 | 11 (26)           | 145 (52)                  | 10.7     | 1  | <0.01 |
|                               | Laceration                     | 13 (30)           | 39 (14)                   | 7.1      | 1  | 0.01  |
|                               | High Lethality                 | 34 (79)           | 191 (69)                  | 1.8      | 1  | 0.21  |
| Education                     |                                |                   |                           | 5.9      | 2  | 0.052 |
|                               | Compulsory Education           | 7 (16)            | 71 (26)                   |          |    |       |
|                               | High School Education and Over | 27 (63)           | 180 (65)                  |          |    |       |
| Axis-I                        |                                |                   |                           |          |    |       |
|                               | Mood Disorders                 | 16 (37)           | 62 (22)                   | 4.4      | 1  | 0.054 |
|                               | Adjustment Disorders           | 3 (7)             | 54 (19)                   | 4.0      | 1  | 0.053 |
| Previous Deliberate Self Harm |                                | 6 (14)            | 115 (42)                  | 12.1     | 2  | <0.01 |
| Current Psychiatric Treatment |                                | 23 (53)           | 185 (67)                  | 8.8      | 3  | <0.05 |
